# Supplementary material for: <strong>Why Has COVID-19 Spread More Extensively in Europe than Asia?</strong>
Source: Preprints.org preprint supplement (doi:10.20944/preprints202005.0200.v1), 2020-05-11
Supplement: Supplementary file 1 [file supplementary]

**Supplementary Online File**

[STable 1. Cumulative number of cases of COVID-19/100 000 (Cases/capita), COVID-19 mortality rate/100 000 inhabitants (Deaths/capita), number tested for COVID-19/100 000 (Tests/capita), date first COVID-19 case reported (Age Epi.) and percent of the test positive (Test Positivity),WHO region and frequency of ACE-1 D-allele in 28 countries with COVID-19 epidemics starting before 8 February 2020. Arranged according to age of. epidemic 3](#_Toc38020441)

[STable 2. Comparison of cumulative number of COVID-19 cases/100 000 inhabitants, deaths/100 000, tests/100 000 and test positivity as of 8 April. Sensitivity analysis limited to countries with epidemics starting prior to 16 March 2020. 4](#_Toc38020442)

# STable 1. Cumulative number of cases of COVID-19/100 000 (Cases/capita), COVID-19 mortality rate/100 000 inhabitants (Deaths/capita), number tested for COVID-19/100 000 (Tests/capita), date first COVID-19 case reported (Age Epi.) and percent of the test positive (Test Positivity),WHO region and frequency of ACE-1 D-allele in 28 countries with COVID-19 epidemics starting before 8 February 2020. Arranged according to age of. epidemic

| Country | Age EPI. | Cases/capita | Deaths/Capita | Tests/Capita. | Test Positivity | WHO region | D-allele freq. |
| --- | --- | --- | --- | --- | --- | --- | --- |
| China | 10-Jan-20 | 5.7 | 0.2 | 306.8 | NA | WPacific | 66.1 |
| Thailand | 12-Jan-20 | 3.4 | 0.04 | 103 | 3.3 | SEAsia | . |
| Japan | 14-Jan-20 | 3.4 | 0.07 | 43.7 | 7.7 | WPacific | 59 |
| South Korea | 19-Jan-20 | 20.3 | 0.4 | 931 | 2.2 | WPacific | 69.7 |
| Taiwan | 20-Jan-20 | 1.6 | 0.02 | 170.9 | 0.9 | WPacific | 45.5 |
| United States | 20-Jan-20 | 122.1 | 3.9 | 636.7 | 19.2 | Americas | 80 |
| Macao | 21-Jan-20 | 6.9 | NA | NA | NA | WPacific | 66.1 |
| Singapore | 22-Jan-20 | 27.7 | 0.1 | 1111 | 2.5 | WPacific | 55 |
| Vietnam | 22-Jan-20 | 0.3 | NA | 113.1 | 0.2 | WPacific | . |
| Hong Kong | 22-Jan-20 | 12.8 | 0.05 | 1290 | 1.0 | WPacific | 67.2 |
| France | 23-Jan-20 | 167.1 | 15.8 | 343.6 | 48.6 | Europe | 82 |
| Nepal | 23-Jan-20 | 0.03 | NA | 7.3 | 0.4 | SEAsia | . |
| Malaysia | 24-Jan-20 | 12.7 | 0.2 | 179.9 | 7.1 | WPacific | 55.5 |
| Australia | 24-Jan-20 | 23.6 | 0.2 | 1252.4 | 1.9 | WPacific | 80.5 |
| Canada | 24-Jan-20 | 48.9 | 1 | 922.3 | 5.3 | Americas | . |
| Cambodia | 26-Jan-20 | 0.7 | NA | 34.5 | 2.0 | WPacific | . |
| Germany | 26-Jan-20 | 130.5 | 2.5 | 1096.2 | 11.9 | Europe | 78.6 |
| Sri Lanka | 26-Jan-20 | 0.9 | 0.03 | 15.2 | 5.8 | SEAsia | . |
| Finland | 28-Jan-20 | 44.9 | 0.7 | 658.8 | 6.8 | Europe | 75.7 |
| United Arab Emirates | 28-Jan-20 | 26.9 | 0.1 | 5451.7 | 0.5 | EMedit | 94 |
| India | 29-Jan-20 | 0.4 | 0.01 | 10.2 | 3.9 | SEAsia | 71.3 |
| Philippines | 29-Jan-20 | 3.5 | 0.2 | 22.4 | 15.8 | WPacific | . |
| Italy | 29-Jan-20 | 224.3 | 28.3 | 1249.5 | 17.9 | Europe | 86 |
| Sweden | 30-Jan-20 | 83.4 | 6.8 | 541.6 | 15.4 | Europe | 73 |
| Russia | 30-Jan-20 | 5.9 | 0.04 | 623.7 | 1.0 | Europe | 77.4 |
| Spain | 30-Jan-20 | 313.7 | 31.1 | 759.3 | 41.3 | Europe | 84.5 |
| United Kingdom | 30-Jan-20 | 81.4 | 9.1 | 392.9 | 20.7 | Europe | 76.7 |
| Belgium | 03-Feb-20 | 201.9 | 19.3 | 726.9 | 27.8 | Europe | 81 |

Abbreviation: NA – not available

# STable 2. Comparison of cumulative number of COVID-19 cases/100 000 inhabitants, deaths/100 000, tests/100 000 and test positivity as of 8 April. Sensitivity analysis limited to countries with epidemics starting prior to 16 March 2020.

|  | Western Pacific [Median (IQR)] | Europe  [Median (IQR)] | P-Value |
| --- | --- | --- | --- |
| N | 17 | 56 |  |
| **Cases/100 000** | 12.7 (3.4-23.6) | 49.7 (18.8-155.2) | <0.0001 |
| **Deaths/100 000** | 0.2 (0.06-0.2) | 1.0 (0.4-4.0) | 0.0004 |
| **Tests/100 000** | 277.0 (113.1-1111) | 658.8 (299.0-1340.8) | 0.0856 |
| **Test positivity (%)** | 2.2 (1.5-6.8) | 9.9 (3.7-15.5) | 0.0006 |
| **D-allele freq. (%)** | 66.2 (55.5-67.2) | 79.7 (76.1-82.0) | <0.0001 |
